# Supplementary material
Source: MDPI journal article supplement (https://www.mdpi.com/2071-1050/15/6/5390)
Supplement: s1 [file s1 › sustainability-2193742-supplementary.pdf]

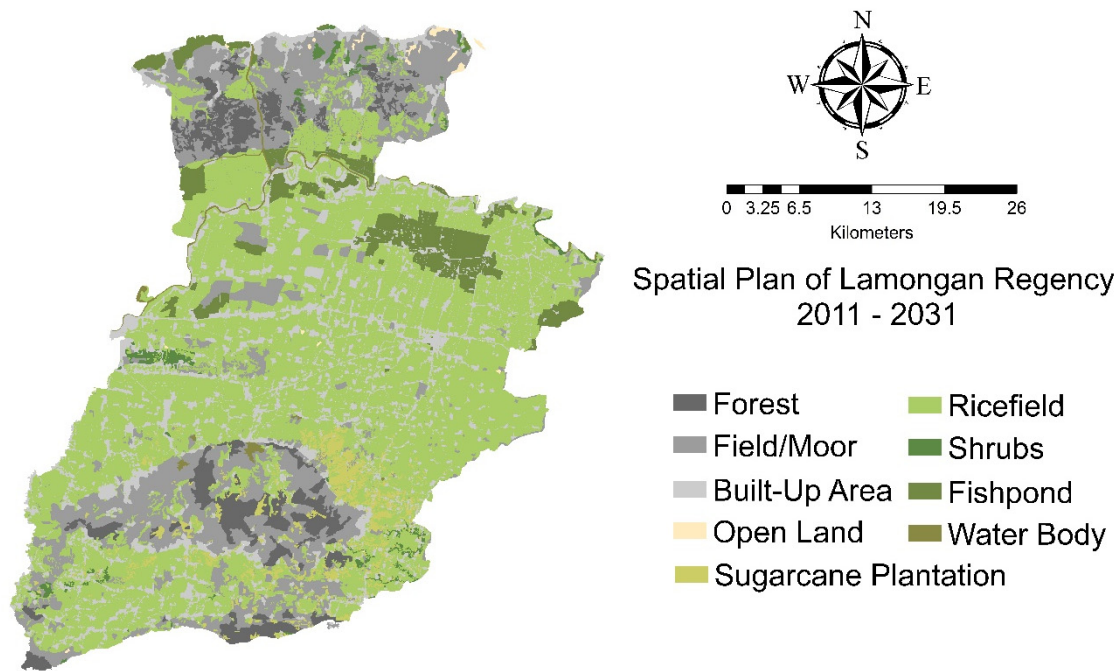

**Figure S1.** Land use/land cover map of Lamongan Regency [12]

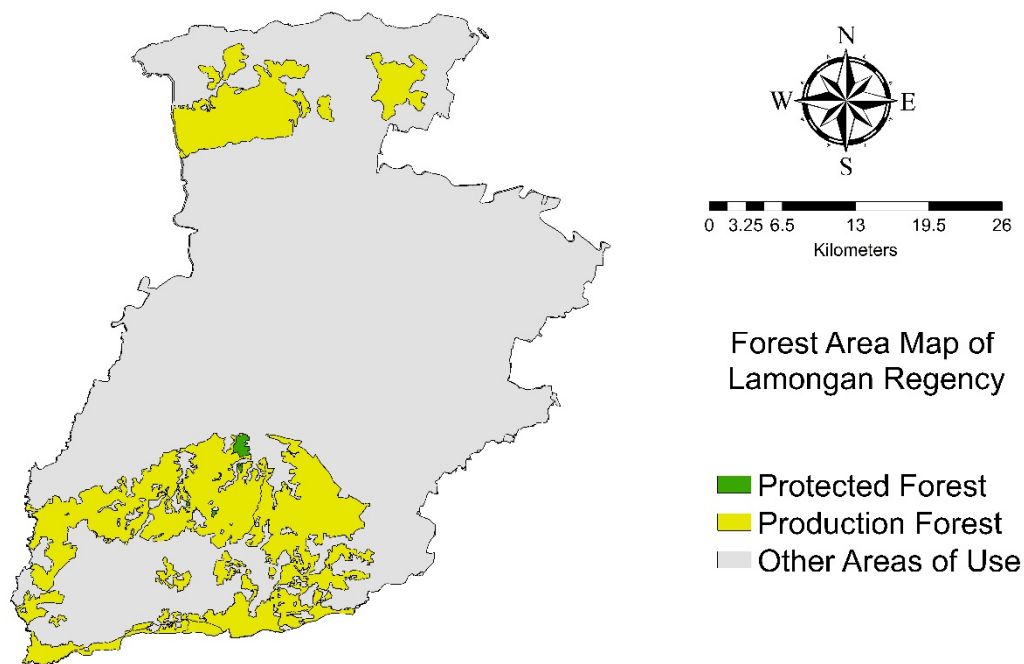

**Figure S2.** Forest area map (source: Ministry of Environment and Forestry, Indonesia)

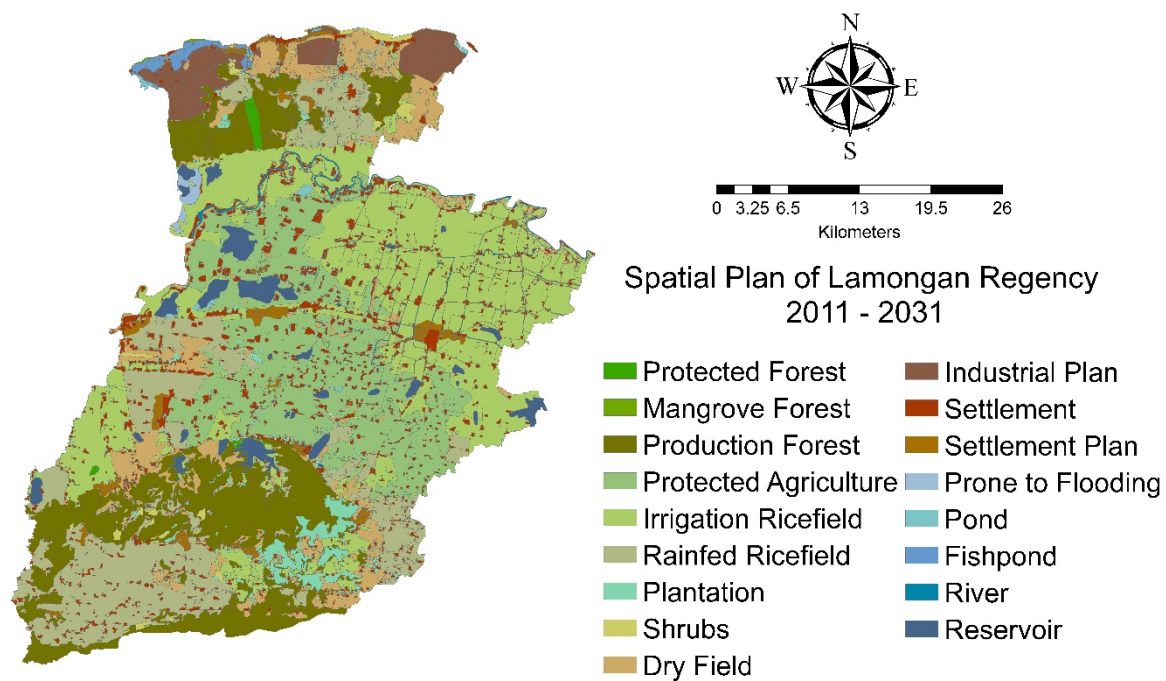

**Figure S3.** Spatial plan map of Lamongan Regency 2011 – 2031 (source: Regional Development Planning Agency, Lamongan Regency)
